# Supplementary material for: Ginsenoside Rh2 suppresses colon cancer growth by targeting the miR-150-3p/SRCIN1/Wnt axis: Ginsenoside Rh2 inhibits colon cancer growth via miR-150-3p/SRCIN1/Wnt
Source: PubMed Central journal article supplement — Acta Biochim Biophys Sin (Shanghai). 2023 Mar 14;55(4):633–48. doi: 10.3724/abbs.2023032 (PMC10195142; doi:10.3724/abbs.2023032), 2023-03-14
Supplement: 440FigS1-TableS1.pdf [file 440FigS1-TableS1.pdf]

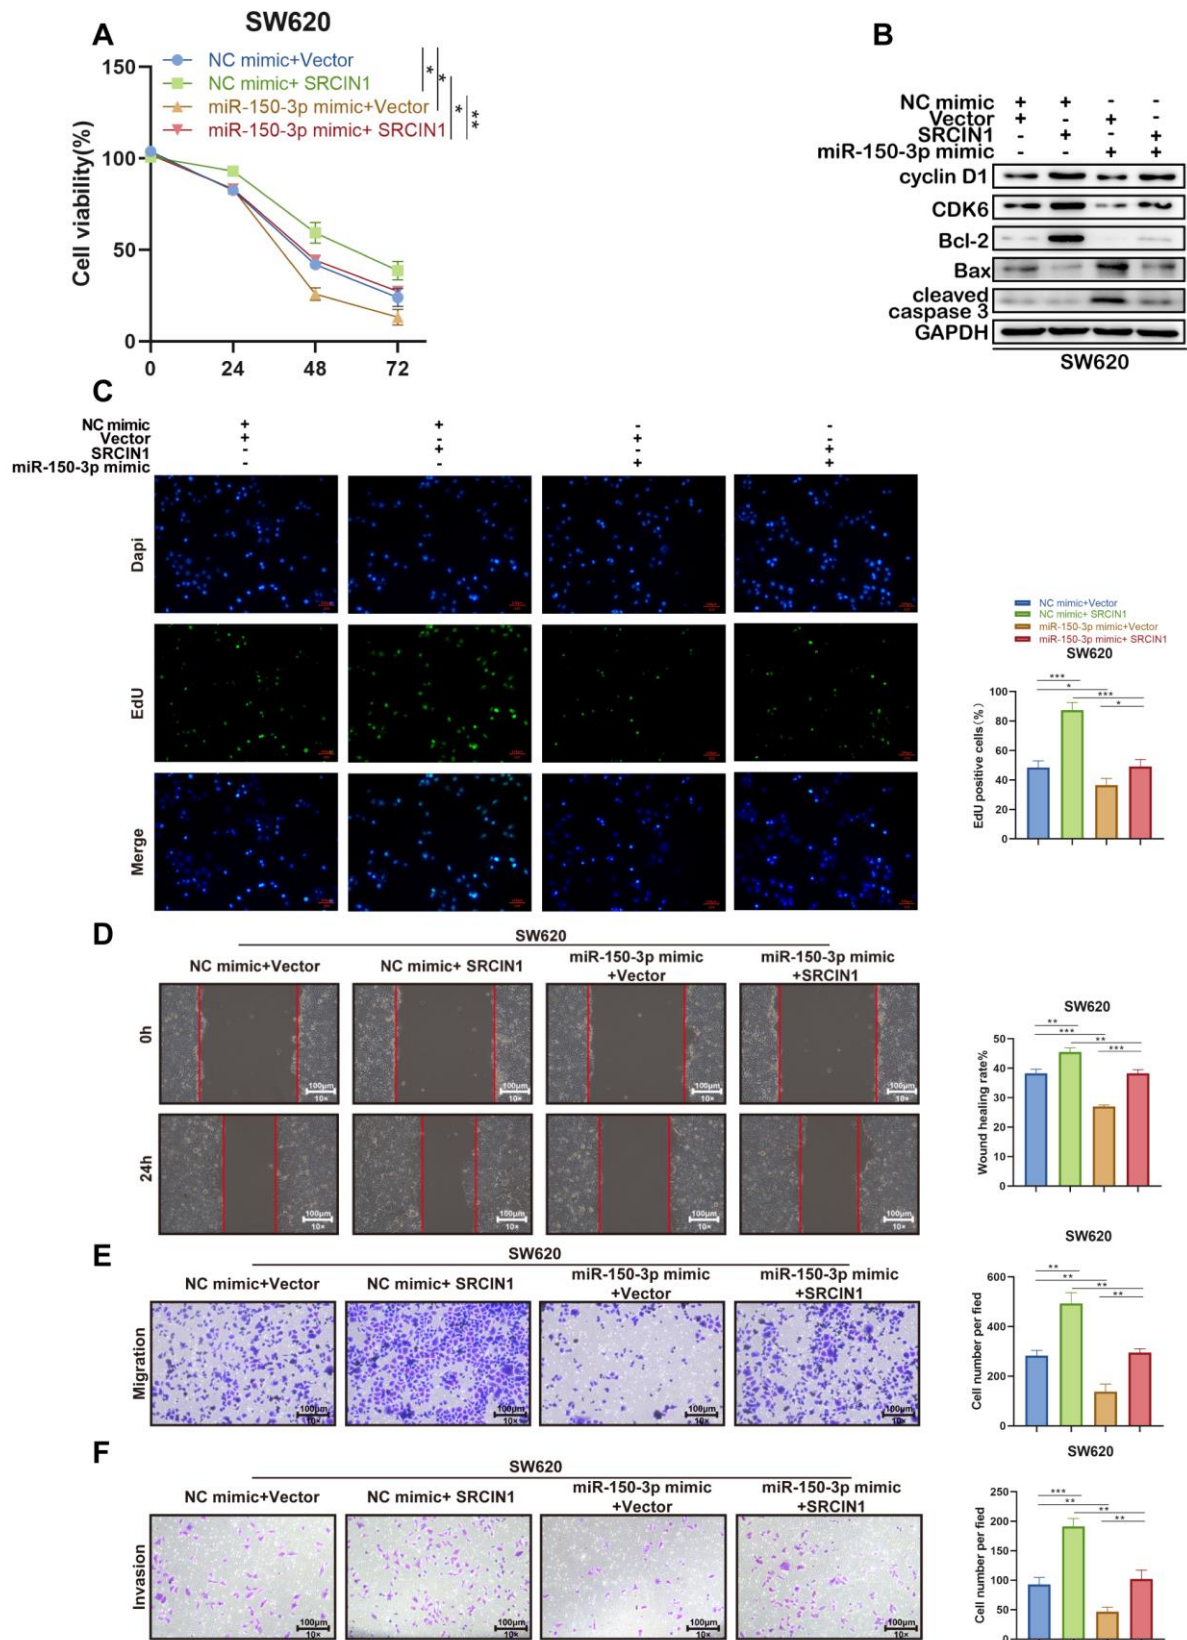

**Supplementary Figure S1. SRCIN1 reversed the regulatory effect of miR-150-3p on SW620 cells** SW620 cells were transfected with NC mimic+ Vector, NC mimic+ SRCIN1

overexpression vector, miR-150-3p mimic+ Vector, and miR-150-3p mimic+ SRCIN1 overexpression vector. **(A)** Viability of SW620 cells at 24, 48, and 72 h. **(B)** Protein levels of Cyclin D1, CDK6, Bcl-2, Bax and cleaved caspase 3 in SW620 cells with the indicated transfection were determined by western blot. GAPDH was used as a loading control. **(C)** EdU assay to detect SW620 cell proliferation. **(D)** Wound healing assay to detect SW620 cell migration. **(E-F)** Transwell assay to detect SW620 cell migration and invasion. Data are presented as the mean  $\pm$  standard deviation. \*\*P < 0.01; \*\*\* P < 0.001.

**Supplementary Table 1. Sequences of PCR primers used in this study**

|            |                |                         |
|------------|----------------|-------------------------|
| miR-150-3p | 5'-3'          | TCTCCCAACCCTTGTACCAGTG  |
|            | 5'-3'          | CAGTGCGTGTCGTGGAGT      |
| SRCIN1     | 5'-3'          | GAGGCTCGCAACGTCTTCTAC   |
|            | 5'-3'          | GCGATGCGTACACCATCTCTC   |
| U6         | 5'-3'          | CTCGCTTCGGCAGCACA       |
|            | 5'-3'          | AACGCTTCACGAATTTGCGT    |
| GAPDH      | Forward(5'-3') | GGAGCGAGATCCCTCCAAAAT   |
|            | Reverse(5'-3') | GGCTGTTGTCATACTTCTCATGG |
