# Supplementary material for: Ginsenoside Rh2 suppresses colon cancer growth by targeting the miR-150-3p/SRCIN1/Wnt axis: Ginsenoside Rh2 inhibits colon cancer growth via miR-150-3p/SRCIN1/Wnt
Source: PubMed Central journal article supplement — Acta Biochim Biophys Sin (Shanghai). 2023 Mar 14;55(4):633–48. doi: 10.3724/abbs.2023032 (PMC10195142; doi:10.3724/abbs.2023032), 2023-03-14
Supplement: TableS1.pdf [file TableS1.pdf]

**Supplementary Table 1. Sequences of PCR primers used in this study**

| Gene              |         | Primer sequence (5'-3') |
|-------------------|---------|-------------------------|
| <i>miR-150-3p</i> | Forward | TCTCCCAACCCTTGTACCAGTG  |
|                   | Reverse | CAGTGCGTGTTCGTGGAGT     |
| <i>SRCIN1</i>     | Forward | GAGGCTCGCAACGTCTTCTAC   |
|                   | Reverse | GCGATGCGTACACCATCTCTC   |
| <i>U6</i>         | Forward | CTCGCTTCGGCAGCACA       |
|                   | Reverse | AACGCTTCACGAATTTGCGT    |
| <i>GAPDH</i>      | Forward | GGAGCGAGATCCCTCCAAAAT   |
|                   | Reverse | GGCTGTTGTCATACTTCTCATGG |
